# Supplementary material for: Efficacy of Low-Dose Estrogen–Progestins and Progestins in Japanese Women with Dysmenorrhea: A Systematic Review and Network Meta-analysis
Source: PubMed Central journal article supplement — Adv Ther. 2022 Sep 1;39(11):4892–909. doi: 10.1007/s12325-022-02298-9 (PMC9525387; doi:10.1007/s12325-022-02298-9), 2022-09-01
Supplement: 12325_2022_2298_MOESM1_ESM.pdf [file 12325_2022_2298_MOESM1_ESM.pdf]

Supplementary Material

**Efficacy of Low-Dose Estrogen–Progestins and Progestins in Japanese Women with Dysmenorrhea: A Systematic Review and Network Meta-analysis**

**Author Details**

Masaru Iwata<sup>1</sup>, Yoshihiro Oikawa<sup>1</sup>, Yutaka Shimizu<sup>1</sup>, Naotaka Sakashita<sup>2</sup>, Ayako Shoji<sup>2,3</sup>, Ataru Igarashi<sup>3,4</sup>, Yutaka Osuga<sup>5</sup>

<sup>1</sup> Mochida Pharmaceutical Co., Ltd., Tokyo, Japan

<sup>2</sup> Medilead, Inc., Tokyo, Japan

<sup>3</sup> Department of Health Economics and Outcomes Research, Graduate School of Pharmaceutical Sciences, The University of Tokyo, Tokyo, Japan

<sup>4</sup> Unit of Public Health and Preventive Medicine, Yokohama City University School of Medicine, Kanagawa, Japan

<sup>5</sup> Department of Obstetrics and Gynecology, Graduate School of Medicine, The University of Tokyo, Tokyo, Japan

**Corresponding author**

Masaru Iwata

Mochida Pharmaceutical Co., Ltd., Tokyo, Japan

e-mail address: [masaru.iwata@mochida.co.jp](mailto:masaru.iwata@mochida.co.jp)

Table S1: Search Strategy in MEDLINE via PubMed

| Search number | Query                                                                                                                                                                                                                                                                                                                                                                                                                                                                                                                    | Results   |
|---------------|--------------------------------------------------------------------------------------------------------------------------------------------------------------------------------------------------------------------------------------------------------------------------------------------------------------------------------------------------------------------------------------------------------------------------------------------------------------------------------------------------------------------------|-----------|
| #1            | dysmenorrhea [MeSH Terms] OR dysmenorrhea [tiab]                                                                                                                                                                                                                                                                                                                                                                                                                                                                         | 6,890     |
| #2            | "primary dysmenorrhea" [tiab] OR "functional dysmenorrhea" [tiab] OR "organic dysmenorrhea" [tiab] OR "secondary dysmenorrhea" [tiab]                                                                                                                                                                                                                                                                                                                                                                                    | 1,174     |
| #3            | #1 OR #2                                                                                                                                                                                                                                                                                                                                                                                                                                                                                                                 | 6,890     |
| #4            | Gestagen [tiab] OR progesterone [tiab] OR Progestin [tiab] OR Progestogen [tiab] OR Estrogen [tiab] OR Oestrogen [tiab] OR Dydrogesterone [tiab] OR Duphaston [tiab] OR "Chlormadinone-Acetate" [tiab] OR Lutoral [tiab] OR Norgestrel [tiab] OR Ethinylestradiol [tiab] OR PLANOVAR [tiab] OR LUNABELL [tiab] OR "IKH-01" [tiab] OR Drospirenone [tiab] OR YAZ [tiab] OR "SH-T00186" [tiab] OR "BAY-86-5300" [tiab] OR Levonorgestrel [tiab] OR Jemina [tiab] OR "NPC-16" [tiab] OR Dienogest [tiab] OR "MJR-35" [tiab] | 213,788   |
| #5            | (randomized controlled trial [pt] OR controlled clinical trial [pt] OR randomized [tiab] OR placebo [tiab] OR clinical trials as topic [mesh: noexp] OR randomly [tiab] OR trial [ti]) NOT (animals [mh] NOT humans [mh])                                                                                                                                                                                                                                                                                                | 1,377,063 |
| #6            | non-Randomized Controlled Trials as Topic[mh] OR Controlled clinical trial [pt] OR Controlled Clinical Trials as Topic [mh] OR comparative study [pt] OR Clinical trial [pt] OR clinical trial [mh] OR Clinical trials as topic [mh] OR cross-over studies [mh]                                                                                                                                                                                                                                                          | 2,868,639 |
| #7            | meta-analysis [pt] OR meta-analysis [mh] OR "meta-analysis" [All] OR (systematic [sb] AND review [pt]) OR "systematic review" [All]                                                                                                                                                                                                                                                                                                                                                                                      | 348,803   |
| #8            | #5 OR #6 OR #7                                                                                                                                                                                                                                                                                                                                                                                                                                                                                                           | 3,481,664 |
| #9            | #3 AND #4 AND #8                                                                                                                                                                                                                                                                                                                                                                                                                                                                                                         | 231       |
| #10           | (#9) AND (1962:2021/08/31 [pdat])                                                                                                                                                                                                                                                                                                                                                                                                                                                                                        | 231       |

Table S2: Search Strategy in ICHUSHI

|    |                                                                                                                                                                                                                                                                                                                                                                                                     |         |
|----|-----------------------------------------------------------------------------------------------------------------------------------------------------------------------------------------------------------------------------------------------------------------------------------------------------------------------------------------------------------------------------------------------------|---------|
| #1 | "dysmenorrhea"                                                                                                                                                                                                                                                                                                                                                                                      | 4199    |
| #2 | "Gestagen" OR "Progestin" OR "progesterone" OR "Progestin" OR "Progestogen" OR "Estrogen" OR "Oestrogen" OR "Dydrogesterone" OR "Duphaston" OR "Chlormadinone-Acetate" OR "Lutoral" OR "Norgestrel" OR "Ethinylestradiol" OR "PLANOVAR" OR "LUNABELL" OR "IKH-01" OR "Drospirenone" OR "YAZ" OR "SH-T00186" OR "BAY-86-5300" OR "Levonorgestrel" OR "Jemina" OR "NPC-16" OR "Dienogest" OR "MJR-35" | 68,920  |
| #3 | "Clinical trials" OR "Clinical trial" OR "Clinical study" OR "Clinical studies" OR "Clinical research" OR "Comparative study" OR "Comparative studies" OR "Comparative research" OR "comparison study" OR "comparison research" OR "Meta-analysis" OR "Systematic Review"                                                                                                                           | 516,305 |
| #4 | #1 and #2 and #3                                                                                                                                                                                                                                                                                                                                                                                    | 83      |
| #5 | #4 and (PDAT=//:2021/8/31)                                                                                                                                                                                                                                                                                                                                                                          | 83      |

Note: Japanese words originally included in the search strategy were translated in English and overlapped words with original English search words were left out from the table.

Table S3: Extracted information

| Article ID               | Intervention/<br>Comparator | Age            | Number of cases |           | Dysmenorrhea Score |                | Visual Analogue Scale |                  | Assessm<br>ent time<br>point<br>(week) | Assessm<br>ent<br>duration<br>in the<br>original<br>study<br>(week) |
|--------------------------|-----------------------------|----------------|-----------------|-----------|--------------------|----------------|-----------------------|------------------|----------------------------------------|---------------------------------------------------------------------|
|                          |                             |                | Primary         | Secondary | Primary            | Secondary      | Primary               | Secondary        |                                        |                                                                     |
| Harada et<br>al.<br>2008 | NET/EE LD-<br>cyclic        | 31.7<br>(5.6)  | NA              | 49        | NA                 | -2.0<br>(1.50) | NA                    | -31.1<br>(28.48) | 16                                     | 16                                                                  |
|                          | Placebo                     | 31.5<br>(6.3)  | NA              | 47        | NA                 | -0.6<br>(1.42) | NA                    | -9.6<br>(29.84)  | 16                                     | 16                                                                  |
| Harada et<br>al.<br>2011 | NET/EE LD-<br>cyclic        | 29.1<br>(6.28) | 52              | NA        | -2.6<br>(1.42)     | NA             | -36.0<br>(21.73)      | NA               | 16                                     | 16                                                                  |
|                          | Placebo                     | 29.2<br>(7.15) | 55              | NA        | -1.4<br>(1.51)     | NA             | -20.8<br>(25.57)      | NA               | 16                                     | 16                                                                  |
| Harada et<br>al.<br>2016 | NET/EE<br>ULD-cyclic        | 32.4<br>(7.29) | 55              | 50        | -2.3<br>(1.66)     | -2.3<br>(1.52) | -32.4<br>(28.52)      | -28.8<br>(29.36) | 16                                     | 16                                                                  |
|                          | Placebo                     | 30.4<br>(7.41) | 28              | 26        | -1.9<br>(1.59)     | -0.7<br>(1.29) | -21.8<br>(29.80)      | -3.6<br>(28.4)   | 16                                     | 16                                                                  |
|                          | NET/EE LD-<br>cyclic        | 34.0<br>(6.93) | NA              | 47        | NA                 | -1.9<br>(1.64) | NA                    | -22.4<br>(30.6)  | 16                                     | 16                                                                  |
| Harada et<br>al.<br>2022 | LNG/EE-<br>cyclic           | 32.1<br>(8.25) | 41              | 40        | -1.9<br>(1.15)     | -1.7<br>(1.14) | NA                    | NA               | 12<br>(1-12)                           | 48                                                                  |
|                          | LNG/EE-<br>extended         | 31.6<br>(8.80) | 44              | 42        | -2.8<br>(1.13)     | -3.3<br>(1.10) | NA                    | NA               | 12<br>(1-12)                           | 48                                                                  |

|                            |                      |                |    |    |                  |                  |                   |                  |              |    |
|----------------------------|----------------------|----------------|----|----|------------------|------------------|-------------------|------------------|--------------|----|
|                            | Placebo              | 33.1<br>(7.70) | 38 | 40 | -0.8<br>(1.11)   | -0.9<br>(1.14)   | NA                | NA               | 12<br>(1-12) | 48 |
| Momoeda<br>et al.<br>2010b | DRSP/EE-<br>cyclic   | 30.9<br>(5.94) | 42 | 19 | -1.79<br>(1.733) | -2.26<br>(1.368) | -27.9<br>(25.49)  | -37.3<br>(22.92) | 16           | 16 |
|                            | Placebo              | 30.8<br>(6.43) | 41 | 17 | -1.02<br>(1.475) | -1.00<br>(1.696) | -11.3<br>(25.53)  | -7.5<br>(22.01)  | 16           | 16 |
| Momoeda<br>et al.<br>2017  | DRSP/EE-<br>extended | 28.9<br>(6.0)  | 45 | 19 | -2.6<br>(1.9)    | -2.3<br>(1.8)    | -36.7<br>(28.4)   | -32.8<br>(23.2)  | 24           | 24 |
|                            | DRSP/EE-<br>cyclic   | 30.4<br>(6.6)  | 66 | 30 | -2.9<br>(1.8)    | -2.0<br>(1.5)    | -40.6<br>(29.8)   | -29.9<br>(26.4)  | 24           | 24 |
| Osuga et<br>al.<br>2020a   | DNG                  | NA             | 47 | NA | -3.1<br>(2.1)    | NA               | -44.31<br>(27.12) | NA               | 12           | 12 |
|                            | Placebo              | NA             | 46 | NA | -1.5<br>(1.7)    | NA               | -21.01<br>(26.77) | NA               | 12           | 12 |
|                            | DRSP/EE-<br>cyclic   | NA             | 47 | NA | -2.3<br>(1.7)    | NA               | -37.29<br>(27.03) | NA               | 12           | 12 |
| Osuga et<br>al.<br>2020b   | DNG                  | NA             | 23 | 24 | -3.3<br>(1.6)    | -3.3<br>(1.5)    | -44.7<br>(27.3)   | -45.2<br>(29.8)  | 12           | 12 |
|                            | Placebo              | NA             | 23 | 24 | -1.5<br>(1.6)    | -0.6<br>(1.8)    | -15.4<br>(23.2)   | 0.9<br>(27.9)    | 12           | 12 |

Values of Age, Dysmenorrhea score and VAS are presented as mean (SD). The total dysmenorrhea score and VAS were not the primary endpoints of DRSP/EE-extended in Momoeda et al. 2017.

The number of decimal places is not necessarily aligned in Table S3 because the descriptions in each original article were compiled.

*DNG* dienogest with continuous regimen, *DRSP/EE-cyclic* drospirenone/ethinylestradiol betadex with cyclic regimen, *DRSP/EE-extended* drospirenone/ethinylestradiol betadex with extended regimen, *LNG/EE-cyclic* levonorgestrel/ethinylestradiol with cyclic regimen, *LNG/EE-extended* levonorgestrel/ethinylestradiol with extended regimen, *NET/EE LD-cyclic* norethisterone/ethinylestradiol with cyclic regimen, *NET/EE ULD-cyclic* ultra-low-dose norethisterone/ethinylestradiol with cyclic regimen

*NA* Not Applicable

Table S4: SUCRA values in network meta-analysis of drug treatments

|                   | Primary dysmenorrhea     |      | Secondary dysmenorrhea   |      |
|-------------------|--------------------------|------|--------------------------|------|
|                   | Total dysmenorrhea score | VAS  | Total dysmenorrhea score | VAS  |
| DNG               | 0.71                     | 0.96 | 0.75                     | 0.95 |
| DRSP/EE-cyclic    | 0.44                     | 0.64 | 0.42                     | 0.59 |
| DRSP/EE-extended  | 0.31                     | 0.45 | 0.51                     | 0.67 |
| LNG/EE-cyclic     | 0.54                     | NA   | 0.28                     | NA   |
| LNG/EE-extended   | 0.78                     | NA   | 0.71                     | NA   |
| NET/EE LD-cyclic  | 0.58                     | 0.55 | 0.44                     | 0.29 |
| NET/EE ULD-cyclic | 0.27                     | 0.37 | 0.56                     | 0.50 |
| Placebo           | 0.09                     | 0.02 | 0.06                     | 0.00 |

*SUCRA* surface under the cumulative ranking curves

*VAS* Visual Analogue Scale

*DNG* dienogest with continuous regimen, *DRSP/EE-cyclic* drospirenone/ethinylestradiol betadex with cyclic regimen, *DRSP/EE-extended* drospirenone/ethinylestradiol betadex with extended regimen, *LNG/EE-cyclic* levonorgestrel/ethinylestradiol with cyclic regimen, *LNG/EE-extended* levonorgestrel/ethinylestradiol with extended regimen, *NET/EE LD-cyclic* norethisterone/ethinylestradiol with cyclic regimen, *NET/EE ULD-cyclic* ultra-low-dose norethisterone/ethinylestradiol with cyclic regimen

Table S5: SUCRA values in network meta-analysis of administration regimens of drug treatments

|            | Primary dysmenorrhea     |      | Secondary dysmenorrhea   |      |
|------------|--------------------------|------|--------------------------|------|
|            | Total dysmenorrhea score | VAS  | Total dysmenorrhea score | VAS  |
| Continuous | 0.87                     | 0.98 | 0.86                     | 0.98 |
| Cyclic     | 0.38                     | 0.59 | 0.36                     | 0.45 |
| Extended   | 0.74                     | 0.41 | 0.77                     | 0.57 |
| Placebo    | 0.00                     | 0.01 | 0.00                     | 0.00 |

The assessment time point of drospirenone/ethinylestradiol betadex with extended regimen were at week 24.

*SUCRA* surface under the cumulative ranking curves

*VAS* Visual Analogue Scale

Continuous group, dienogest; extended group, drospirenone/ethinylestradiol betadex with extended regimen and levonorgestrel/ethinylestradiol with extended regimen (note that visual analogue scale was not available for levonorgestrel/ethinylestradiol with extended regimen, so it is included only in the extended group of total dysmenorrhea score); and cyclic group, levonorgestrel/ethinylestradiol with cyclic regimen, norethisterone/ethinylestradiol, ultra-low-dose norethisterone/ethinylestradiol, and drospirenone/ethinylestradiol betadex with cyclic

regimen

|                           | Selection bias Random sequence generation | Selection bias Allocation concealment | Performance bias Blinding (participants and personnel) | Detection bias Blinding (outcome assessment) | Attrition bias Incomplete outcome data | Reporting bias Selective reporting | Other bias Other sources of bias |
|---------------------------|-------------------------------------------|---------------------------------------|--------------------------------------------------------|----------------------------------------------|----------------------------------------|------------------------------------|----------------------------------|
| Harada et al. 2008        | +                                         | +                                     | +                                                      | +                                            | +                                      | ?                                  | +                                |
| Harada et al. 2011        | +                                         | +                                     | +                                                      | +                                            | ?                                      | +                                  | +                                |
| Harada et al. 2016        | +                                         | +                                     | +                                                      | +                                            | ?                                      | +                                  | +                                |
| Harada <i>et al.</i> 2021 | +                                         | +                                     | +                                                      | +                                            | +                                      | +                                  | +                                |
| Momoeda et al. 2010a      | ?                                         | ?                                     | -                                                      | -                                            | +                                      | ?                                  | +                                |
| Momoeda et al. 2010b      | ?                                         | ?                                     | ?                                                      | ?                                            | ?                                      | ?                                  | +                                |
| Momoede et al. 2014       | ?                                         | ?                                     | -                                                      | -                                            | ?                                      | +                                  | ?                                |
| Momoeda et al. 2017       | ?                                         | ?                                     | -                                                      | -                                            | +                                      | +                                  | +                                |
| Osuga et al. 2020a        | +                                         | +                                     | +                                                      | +                                            | ?                                      | +                                  | +                                |
| Osuga et al. 2020b        | +                                         | +                                     | +                                                      | +                                            | +                                      | +                                  | +                                |

Figure S1. Risk of bias summary of reviewers' assessments of each risk of bias item in included studies



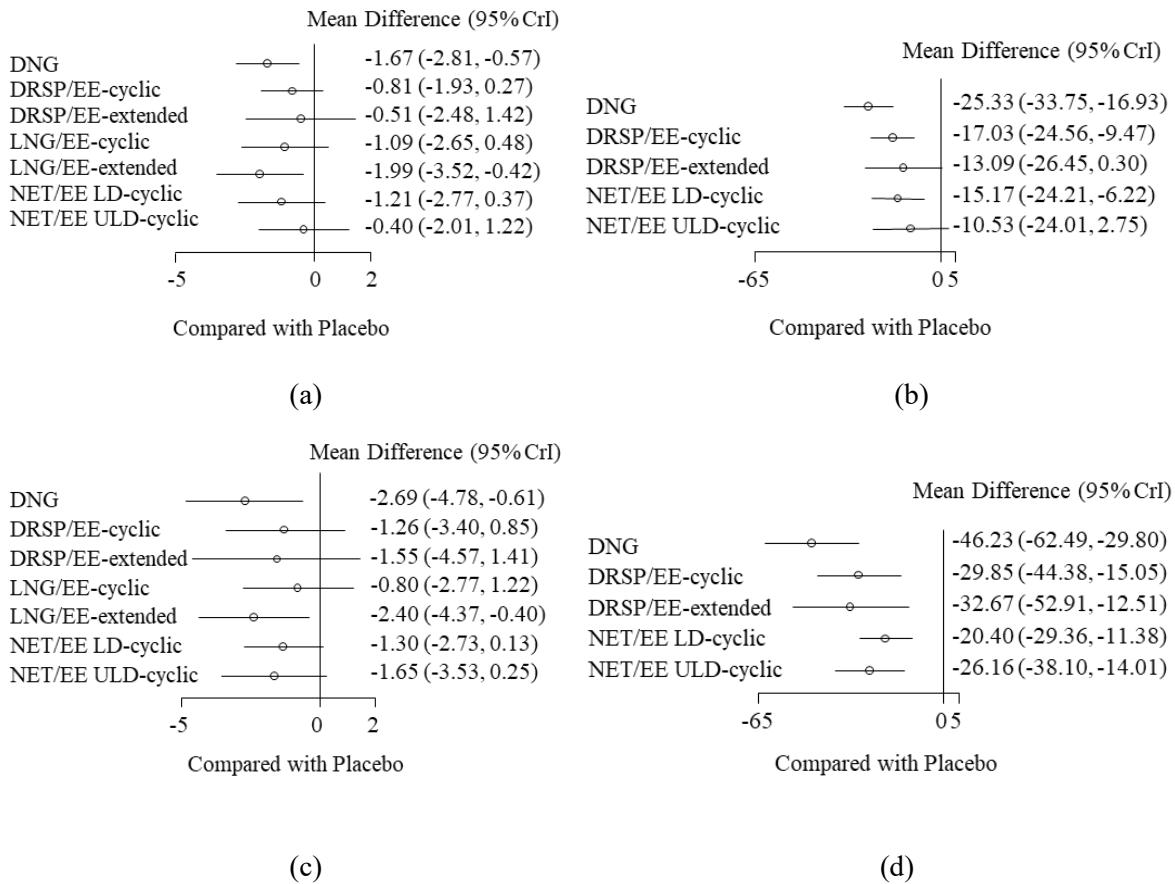

Figure S2. Forest plot of network meta-analysis of drug treatments for dysmenorrhea assessed by total dysmenorrhea score (a, primary dysmenorrhea; c, secondary dysmenorrhea) and visual analogue scale (b, primary dysmenorrhea; d, secondary dysmenorrhea)

The assessment time point of drospirenone/ethinylestradiol betadex with extended regimen were at week 24.

95% CrI 95% credible interval

*DNG* dienogest with continuous regimen, *DRSP/EE-cyclic* drospirenone/ethinylestradiol betadex with cyclic regimen, *DRSP/EE-extended* drospirenone/ethinylestradiol betadex with extended regimen, *LNG/EE-cyclic* levonorgestrel/ethinylestradiol with cyclic regimen, *LNG/EE-extended* levonorgestrel/ethinylestradiol with extended regimen, *NET/EE LD-cyclic* norethisterone/ethinylestradiol with cyclic regimen, *NET/EE ULD-cyclic* ultra-low-dose norethisterone/ethinylestradiol with cyclic regimen

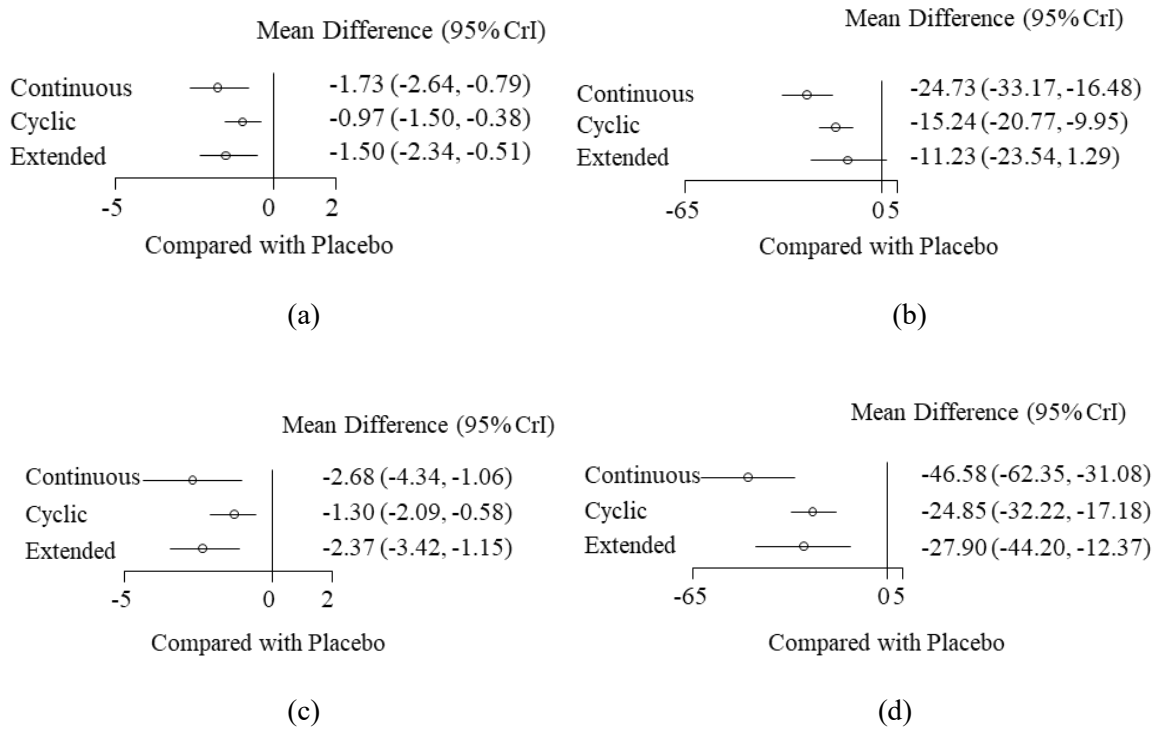

Figure S3. Forest plot of network meta-analysis of administration regimens of drug treatments for dysmenorrhea assessed by total dysmenorrhea score (a, primary dysmenorrhea; c, secondary dysmenorrhea) and visual analogue scale (b, primary dysmenorrhea; d, secondary dysmenorrhea)

The assessment time point of drospirenone/ethinylestradiol betadex with extended regimen were at week 24.

95% CrI 95% credible interval

Continuous group, dienogest continuous; extended group, drospirenone/ethinylestradiol betadex with extended regimen and levonorgestrel/ethinylestradiol with extended regimen (note that visual analogue scale was not available for levonorgestrel/ethinylestradiol with extended regimen, so it is included only in the extended group in Figure S3a, c and not Figure S3b, d); and cyclic group, levonorgestrel/ethinylestradiol with cyclic regimen, norethisterone/ethinylestradiol, ultra-low-dose norethisterone/ethinylestradiol, and drospirenone/ethinylestradiol betadex with cyclic regimen

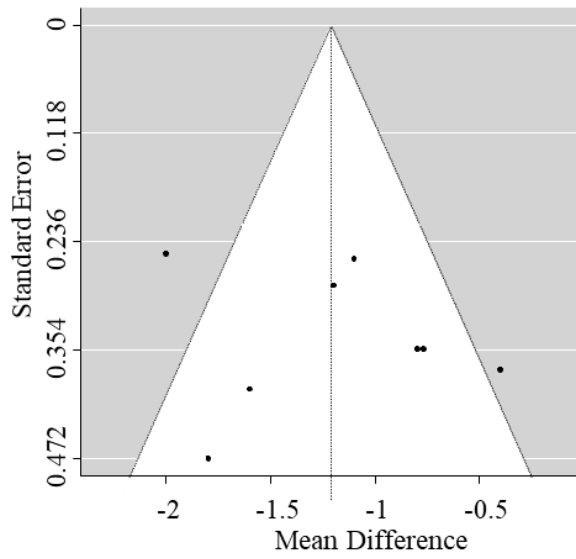

(a)

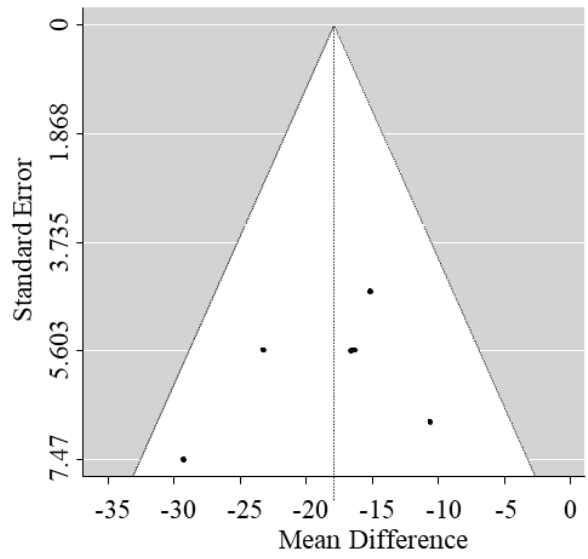

(b)

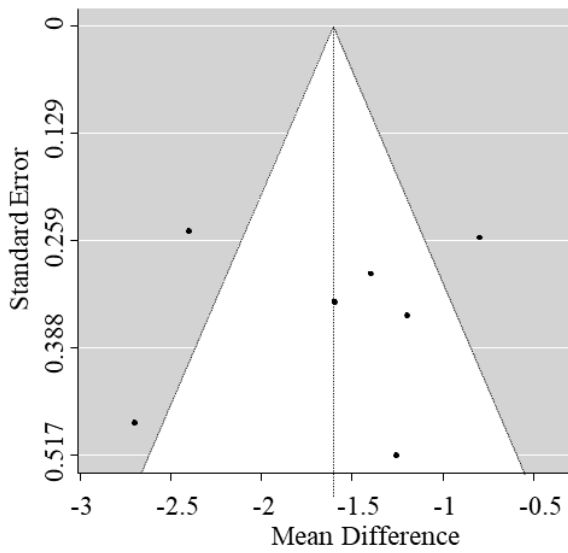

(c)

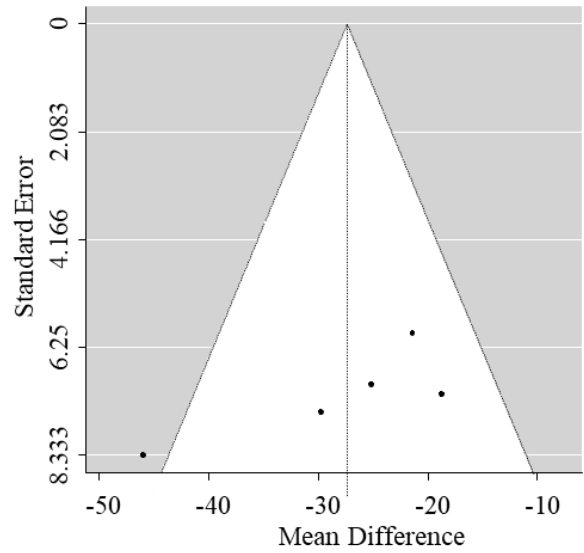

(d)

Figure S4. Funnel plot on dysmenorrhea assessed by total dysmenorrhea score (a, primary dysmenorrhea; c, secondary dysmenorrhea) and visual analogue scale (b, primary dysmenorrhea; d, secondary dysmenorrhea)
